# Supplementary material for: Serum metabolomics reveals betaine and phosphatidylcholine as potential biomarkers for the toxic responses of processed Aconitum carmichaelii Debx
Source: Royal Society of Chemistry journal article supplement (doi:10.1039/c4mb00072b), 2014-05-07
Supplement: c4mb00072b1.pdf [file c4mb00072b1.pdf]

## Supplementary Material

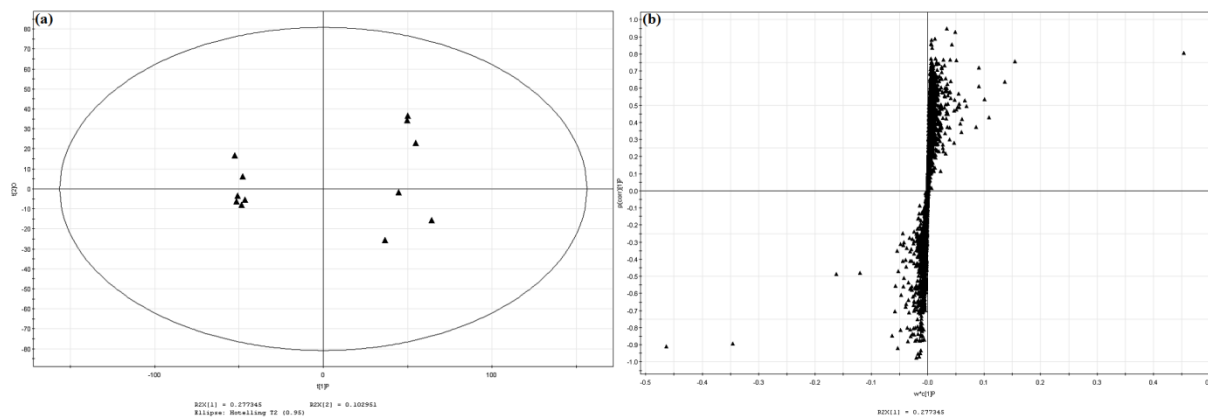

**Fig s1.** Multiple pattern recognition of serum biomarkers between C and CB1. (a) OPLS score plot ( $n=6$ ,  $k=5325$ ,  $R^2Y=0.911$ ,  $R^2X=0.380$ ,  $Q^2=0.815$ ): (left  $\blacktriangle$ ) C; (right  $\blacktriangle$ ) CB1. (b) OPLS S-plot. Each triangle in the S-plot represents an ion. Ions far away from origin are regarded as potential biomarkers.

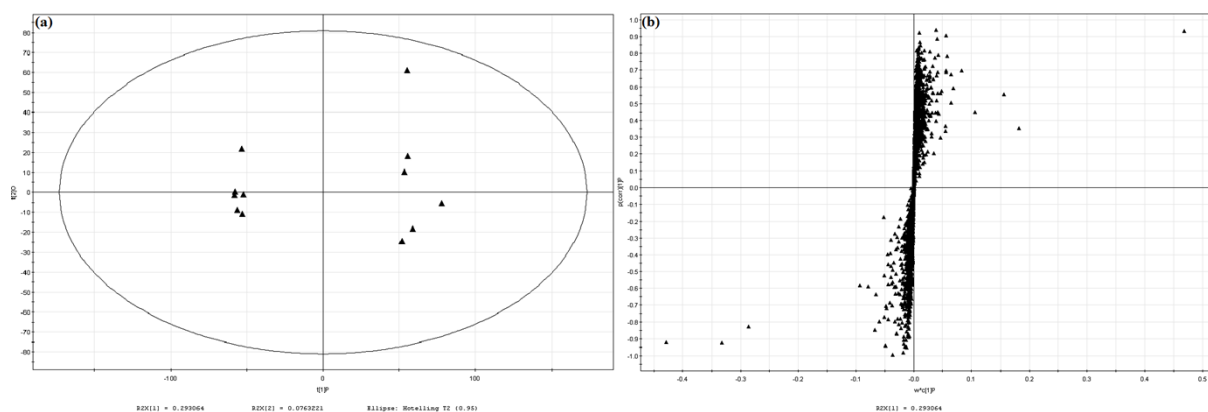

**Fig s2.** Multiple pattern recognition of serum biomarkers between C and CB2. (a) OPLS score plot ( $n=6$ ,  $k=5325$ ,  $R^2Y=0.998$ ,  $R^2X=0.369$ ,  $Q^2=0.897$ ): (left  $\blacktriangle$ ) C; (right  $\blacktriangle$ ) CB2. (b) OPLS S-plot. Each triangle in the S-plot represents an ion. Ions far away from origin are regarded as potential biomarkers.

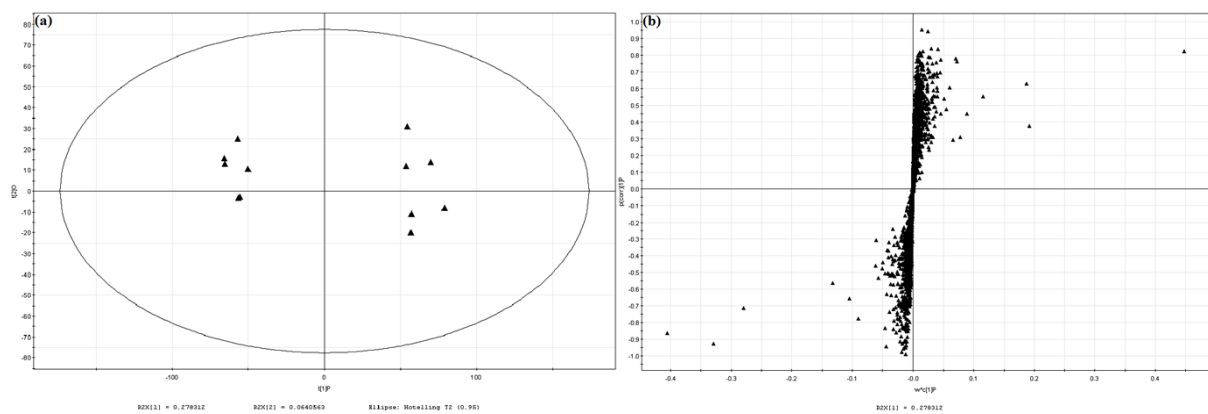

**Fig s3.** Multiple pattern recognition of serum biomarkers between C and CB3. (a) OPLS score plot ( $n=6$ ,  $k=5325$ ,  $R^2Y=0.999$ ,  $R^2X=0.342$ ,  $Q^2=0.896$ ): (left ▲) C; (right ▲) CB3. (b) OPLS S- plot. Each triangle in the S-plot represents an ion. Ions far away from origin are regarded as potential biomarkers.

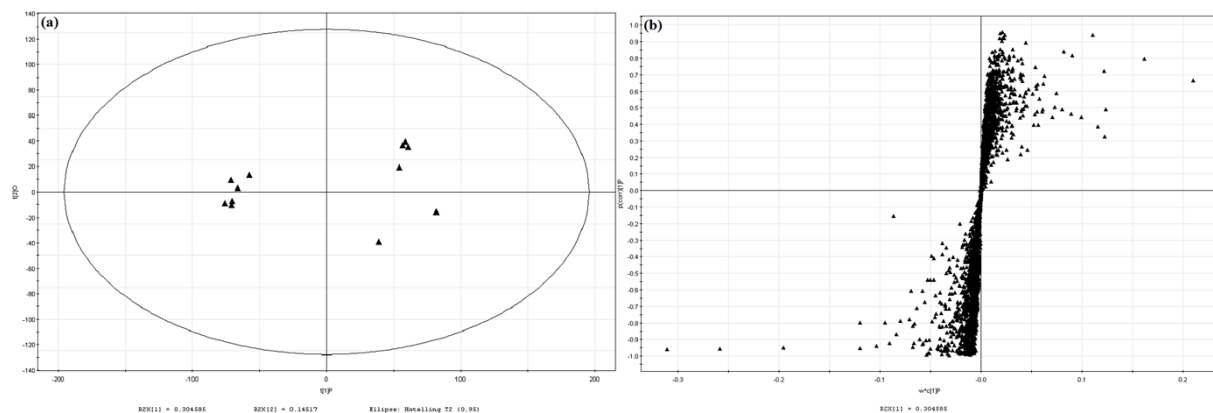

**Fig s4.** Multiple pattern recognition of serum biomarkers between C and CB4. (a) OPLS score plot ( $n=6$ ,  $k=5325$ ,  $R^2Y=0.996$ ,  $R^2X=0.450$ ,  $Q^2=0.946$ ): (left ▲) C; (right ▲) CB4. (b) OPLS S- plot. Each triangle in the S-plot represents an ion. Ions far away from origin are regarded as potential biomarkers
